# Supplementary material for: Enhanced Fenton-like catalytic performance of N-doped graphene quantum dot incorporated CuCo2O4
Source: Royal Society of Chemistry journal article supplement (doi:10.1039/c8nj00219c), 2018-01-01
Supplement: c8nj00219c1.pdf [file c8nj00219c1.pdf]

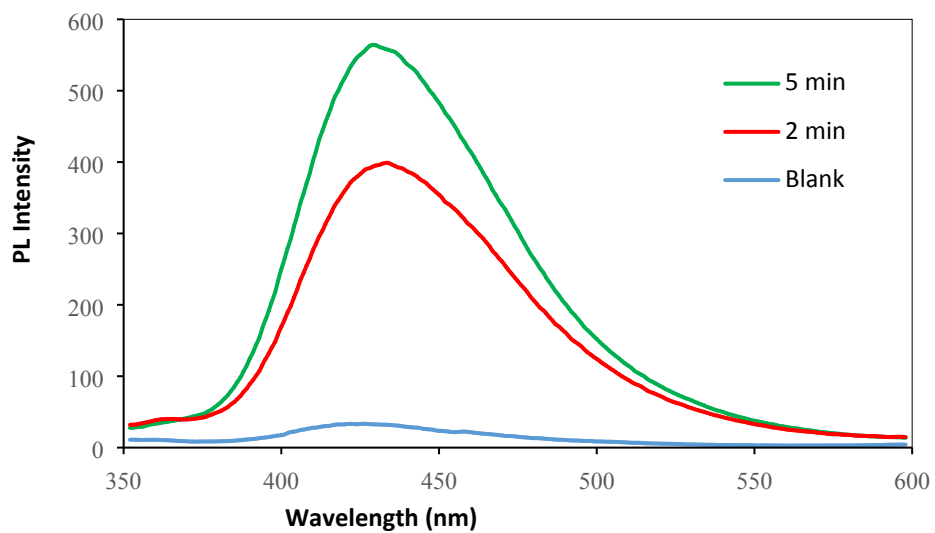

**Fig. S1.** PL spectra of the TA solution after reaction with H<sub>2</sub>O<sub>2</sub> for 2 and 5 min over CuCo<sub>2</sub>O<sub>4</sub>/N-GQDs. (Reaction condition: similar to the degradation of MB, except that the MB aqueous solution was replaced by alkaline terephthalic acid ( $5 \times 10^{-4}$  mol/L TA +  $2 \times 10^{-3}$  mol/L NaOH))

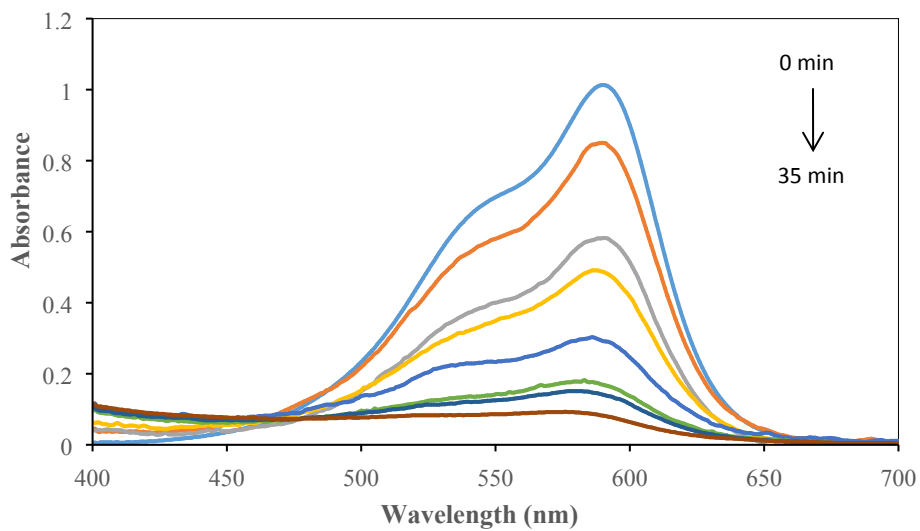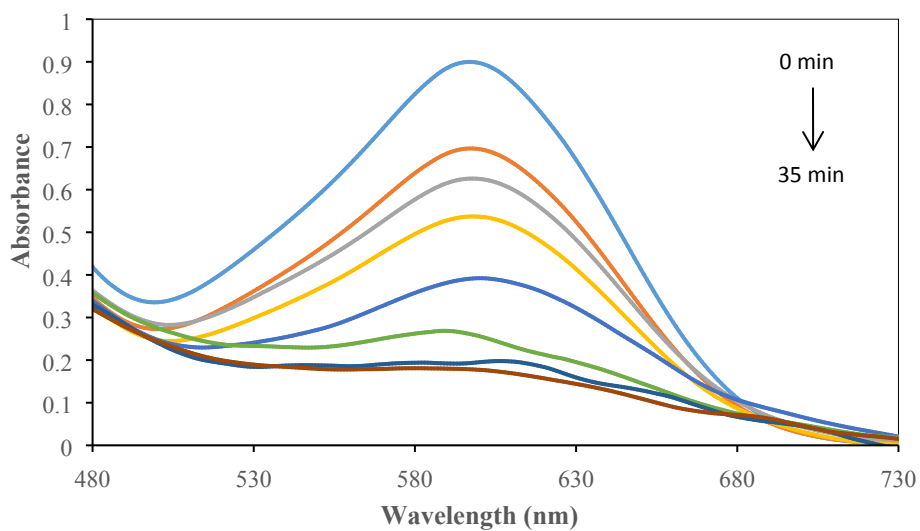

**Fig. S2.** Change in absorbance spectra of CV (a) and CR(b) at different time intervals in the presence of  $\text{CuCo}_2\text{O}_4/\text{N-GQDs}$ . (Reaction conditions:  $C_{\text{CV}} = 5.0 \text{ mg/L}$ ,  $C_{\text{CR}} = 20.0 \text{ mg/L}$ ,  $C_{\text{H}_2\text{O}_2} = 0.1 \text{ mol/L}$ , catalyst amount = 8 mg, pH = 7.0).

**Table S1.** The experimental variables and levels of the Box-Behnken design

| Variables                                           | Symbols |       | Levels |        |       |
|-----------------------------------------------------|---------|-------|--------|--------|-------|
|                                                     | Uncoded | Coded | Low    | Middle | High  |
| pH                                                  | $X_1$   | $x_1$ | 4.0    | 7.0    | 10.0  |
| Catalyst mass (g)                                   | $X_2$   | $x_2$ | 0.002  | 0.005  | 0.008 |
| H <sub>2</sub> O <sub>2</sub> Concentration (mol/L) | $X_3$   | $x_3$ | 0.02   | 0.06   | 0.10  |

**Table S2.** Design matrix in the Box-Behnken model, observed and predicted values

| Runs | Actual level of factors |       |       | Coded level of factors |       |       | $k_{obs}$ |           |
|------|-------------------------|-------|-------|------------------------|-------|-------|-----------|-----------|
|      | $X_1$                   | $X_2$ | $X_3$ | $x_1$                  | $x_2$ | $x_3$ | Observed  | Predicted |
| 1    | 7.0                     | 0.005 | 0.06  | 0                      | 0     | 0     | 0.035     | 0.036     |
| 2    | 4.0                     | 0.002 | 0.06  | -1                     | -1    | 0     | 0.005     | 0.001     |
| 3    | 4.0                     | 0.005 | 0.1   | -1                     | 0     | +1    | 0.012     | 0.012     |
| 4    | 4.0                     | 0.008 | 0.06  | -1                     | +1    | 0     | 0.018     | 0.020     |
| 5    | 7.0                     | 0.008 | 0.02  | 0                      | +1    | -1    | 0.034     | 0.031     |
| 6    | 7.0                     | 0.008 | 0.1   | 0                      | +1    | +1    | 0.099     | 0.096     |
| 7    | 7.0                     | 0.002 | 0.1   | 0                      | -1    | +1    | 0.020     | 0.023     |
| 8    | 7.0                     | 0.005 | 0.06  | 0                      | 0     | 0     | 0.033     | 0.036     |
| 9    | 10.0                    | 0.002 | 0.06  | +1                     | -1    | 0     | 0.026     | 0.024     |
| 10   | 10.0                    | 0.008 | 0.06  | +1                     | +1    | 0     | 0.093     | 0.096     |
| 11   | 10.0                    | 0.005 | 0.1   | +1                     | 0     | +1    | 0.099     | 0.097     |
| 12   | 7.0                     | 0.005 | 0.06  | 0                      | 0     | 0     | 0.041     | 0.036     |
| 13   | 7.0                     | 0.002 | 0.02  | 0                      | -1    | -1    | 0.010     | 0.012     |
| 14   | 4.0                     | 0.005 | 0.02  | -1                     | 0     | -1    | 0.008     | 0.009     |
| 15   | 10.0                    | 0.005 | 0.02  | +1                     | 0     | -1    | 0.023     | 0.023     |

**Table S3.** Analysis of variance (ANOVA) for Box-Benken design.

| Source of variation             | Df <sup>a</sup> | SS <sup>b</sup> | MS <sup>c</sup> | F value | P value <sup>d</sup> |
|---------------------------------|-----------------|-----------------|-----------------|---------|----------------------|
| Model                           | 9               | 0.014947        | 0.001661        | 76.59   | 0.000                |
| X <sub>1</sub>                  | 1               | 0.004900        | 0.004900        | 226.00  | 0.000                |
| X <sub>2</sub>                  | 1               | 0.004186        | 0.004186        | 193.06  | 0.000                |
| X <sub>3</sub>                  | 1               | 0.003003        | 0.003003        | 138.50  | 0.000                |
| X <sub>1</sub> <sup>2</sup>     | 1               | 0.000034        | 0.000034        | 1.58    | 0.265                |
| X <sub>2</sub> <sup>2</sup>     | 1               | 0.000018        | 0.000018        | 0.83    | 0.404                |
| X <sub>3</sub> <sup>2</sup>     | 1               | 0.000018        | 0.000018        | 0.83    | 0.404                |
| X <sub>1</sub> × X <sub>2</sub> | 1               | 0.000729        | 0.000729        | 33.62   | 0.002                |
| X <sub>1</sub> × X <sub>3</sub> | 1               | 0.001296        | 0.001296        | 59.77   | 0.001                |
| X <sub>2</sub> × X <sub>3</sub> | 1               | 0.000756        | 0.000756        | 34.88   | 0.002                |
| Lack-of-Fit                     | 3               | 0.000074        | 0.000025        | 1.42    | 0.439                |
| Pure Error                      | 2               | 0.000035        | 0.000017        |         |                      |
| Total                           | 26              | 0.015055        |                 |         |                      |

<sup>a</sup> Degrees of freedom

<sup>b</sup> Sum of square

<sup>c</sup> Mean square

<sup>d</sup> p Values <0.05 were considered to be significant.
